# Supplementary material
Source: Springer Nature journal article supplement (http://www.springermedizin.de/resource/supplementary/12876_2012_981_MOESM1_ESM.pdf/9437836)

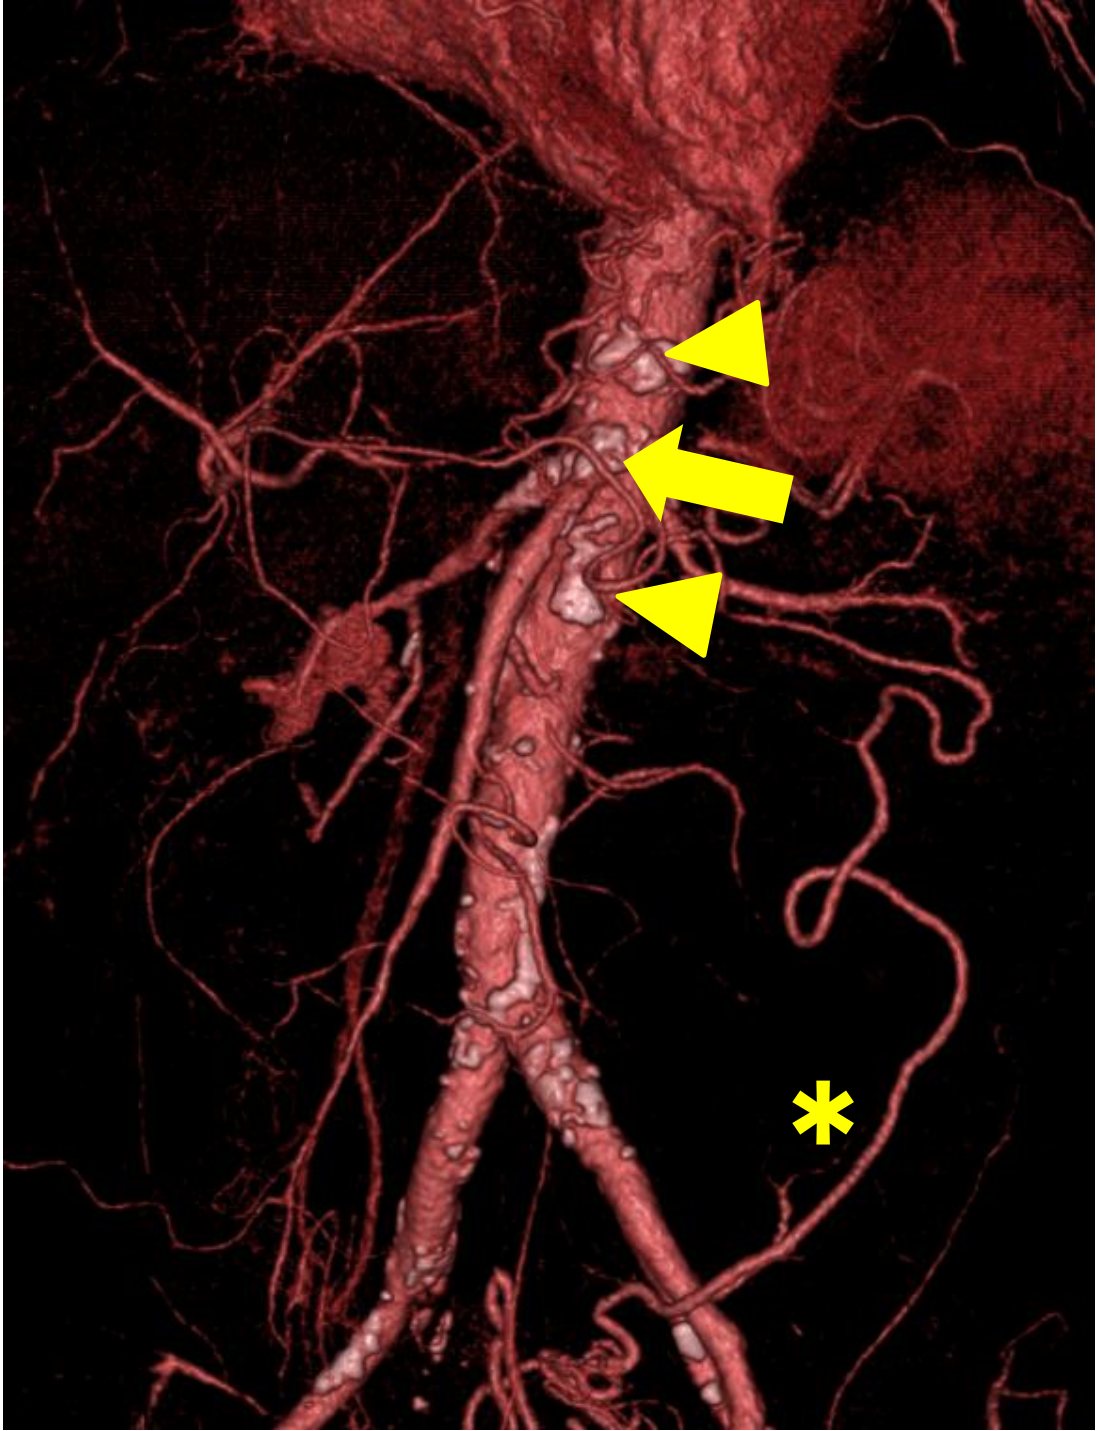

Supplement: MOESM1 [file 9437836]
